# Supplementary material for: Smoking and pre-existing co-morbidities as risk factors for developing severity of COVID-19 infection: Evidence from a field hospital in a rural area of Bangladesh
Source: PLoS One. 2023 Dec 8;18(12):e0295040. doi: 10.1371/journal.pone.0295040 (PMC10707513; doi:10.1371/journal.pone.0295040)
Supplement: S1 Data — (CSV) [file pone.0295040.s001.csv]

serial no	age	gender	comorbidity	htn	dm	copd	cvd	asthma	smoke_hist	severity
1	29	male	no	n/a	n/a	n/a	n/a	n/a	non-smoker	mild
2	25	female	no	n/a	n/a	n/a	n/a	n/a	non-smoker	mild
3	25	male	no	n/a	n/a	n/a	n/a	n/a	non-smoker	mild
4	25	female	no	n/a	n/a	n/a	n/a	n/a	non-smoker	mild
5	24	female	yes	TRUE	n/a	n/a	n/a	n/a	non-smoker	mild
6	18	male	no	n/a	n/a	n/a	n/a	n/a	non-smoker	mild
7	27	male	no	n/a	n/a	n/a	n/a	n/a	non-smoker	mild
8	40	male	no	n/a	n/a	n/a	n/a	n/a	non-smoker	moderate
9	29	male	no	n/a	n/a	n/a	n/a	n/a	ever-smoker	mild
10	85	female	no	n/a	n/a	n/a	n/a	n/a	non-smoker	moderate
11	18	male	no	n/a	n/a	n/a	n/a	n/a	non-smoker	mild
12	26	male	no	n/a	n/a	n/a	n/a	n/a	ever-smoker	severe
13	47	male	yes	TRUE	n/a	n/a	n/a	TRUE	ever-smoker	moderate
14	50	female	yes	TRUE	n/a	TRUE	n/a	n/a	non-smoker	severe
15	34	male	no	n/a	n/a	n/a	n/a	n/a	non-smoker	moderate
16	32	male	no	n/a	n/a	n/a	n/a	n/a	non-smoker	moderate
17	60	female	yes	n/a	n/a	TRUE	n/a	n/a	non-smoker	severe
18	25	male	no	n/a	n/a	n/a	n/a	n/a	non-smoker	mild
19	60	female	yes	TRUE	TRUE	n/a	n/a	n/a	non-smoker	severe
20	38	female	yes	n/a	TRUE	n/a	n/a	n/a	non-smoker	severe
21	26	female	no	n/a	n/a	n/a	n/a	n/a	non-smoker	mild
22	53	male	yes	TRUE	TRUE	n/a	n/a	n/a	non-smoker	moderate
23	32	male	no	n/a	n/a	n/a	n/a	n/a	non-smoker	mild
24	19	male	no	n/a	n/a	n/a	n/a	n/a	non-smoker	mild
25	70	female	no	n/a	n/a	n/a	n/a	n/a	non-smoker	moderate
26	28	male	no	n/a	n/a	n/a	n/a	n/a	non-smoker	mild
27	19	female	no	n/a	n/a	n/a	n/a	n/a	non-smoker	mild
28	30	male	no	n/a	n/a	n/a	n/a	n/a	non-smoker	mild
29	18	male	no	n/a	n/a	n/a	n/a	n/a	non-smoker	mild
30	45	male	no	n/a	n/a	n/a	n/a	n/a	non-smoker	mild
31	35	female	no	n/a	n/a	n/a	n/a	n/a	non-smoker	mild
32	25	male	no	n/a	n/a	n/a	n/a	n/a	non-smoker	mild
33	30	female	no	n/a	n/a	n/a	n/a	n/a	non-smoker	mild
34	29	female	no	n/a	n/a	n/a	n/a	n/a	non-smoker	mild
35	60	male	yes	TRUE	TRUE	n/a	n/a	n/a	ever-smoker	severe
36	70	male	yes	n/a	n/a	TRUE	n/a	n/a	non-smoker	severe
37	26	female	no	n/a	n/a	n/a	n/a	n/a	non-smoker	moderate
38	70	male	no	n/a	n/a	n/a	n/a	n/a	ever-smoker	severe
39	24	male	no	n/a	n/a	n/a	n/a	n/a	non-smoker	mild
40	41	male	yes	n/a	TRUE	n/a	n/a	n/a	non-smoker	severe
41	22	male	no	n/a	n/a	n/a	n/a	n/a	non-smoker	mild
42	24	male	no	n/a	n/a	n/a	n/a	n/a	non-smoker	mild
43	27	female	no	n/a	n/a	n/a	n/a	n/a	non-smoker	mild
44	28	male	no	n/a	n/a	n/a	n/a	n/a	non-smoker	mild
45	26	female	no	n/a	n/a	n/a	n/a	n/a	non-smoker	mild
46	25	male	no	n/a	n/a	n/a	n/a	n/a	non-smoker	mild
47	25	female	no	n/a	n/a	n/a	n/a	n/a	non-smoker	mild
48	27	male	no	n/a	n/a	n/a	n/a	n/a	non-smoker	severe
49	50	male	no	n/a	n/a	n/a	n/a	n/a	non-smoker	moderate
50	70	male	no	n/a	n/a	n/a	n/a	n/a	ever-smoker	severe
51	32	male	no	n/a	n/a	n/a	n/a	n/a	non-smoker	mild
52	19	male	no	n/a	n/a	n/a	n/a	n/a	ever-smoker	moderate
53	45	male	yes	TRUE	n/a	n/a	n/a	n/a	non-smoker	severe
54	42	male	yes	TRUE	TRUE	n/a	n/a	n/a	non-smoker	severe
55	60	male	no	n/a	n/a	n/a	n/a	n/a	ever-smoker	moderate
56	29	male	no	n/a	n/a	n/a	n/a	n/a	non-smoker	mild
57	35	male	no	n/a	n/a	n/a	n/a	n/a	non-smoker	severe
58	33	male	no	n/a	n/a	n/a	n/a	n/a	non-smoker	mild
59	35	male	no	n/a	n/a	n/a	n/a	n/a	non-smoker	mild
60	27	male	no	n/a	n/a	n/a	n/a	n/a	non-smoker	mild
61	38	male	no	n/a	n/a	n/a	n/a	n/a	non-smoker	severe
62	40	female	yes	TRUE	TRUE	TRUE	n/a	n/a	non-smoker	severe
63	70	male	yes	n/a	n/a	TRUE	n/a	n/a	ever-smoker	severe
64	22	male	no	n/a	n/a	n/a	n/a	n/a	non-smoker	mild
65	30	male	no	n/a	n/a	n/a	n/a	n/a	non-smoker	mild
66	40	male	yes	n/a	n/a	n/a	TRUE	n/a	non-smoker	moderate
67	27	male	no	n/a	n/a	n/a	n/a	n/a	non-smoker	mild
68	55	male	no	n/a	n/a	n/a	n/a	n/a	non-smoker	moderate
69	70	female	no	n/a	n/a	n/a	n/a	n/a	ever-smoker	severe
70	18	female	no	n/a	n/a	n/a	n/a	n/a	non-smoker	mild
71	34	male	no	n/a	n/a	n/a	n/a	n/a	non-smoker	moderate
72	33	male	no	n/a	n/a	n/a	n/a	n/a	non-smoker	mild
73	34	male	no	n/a	n/a	n/a	n/a	n/a	non-smoker	mild
74	24	female	no	n/a	n/a	n/a	n/a	n/a	non-smoker	mild
75	30	male	no	n/a	n/a	n/a	n/a	n/a	non-smoker	mild
76	24	female	no	n/a	n/a	n/a	n/a	n/a	non-smoker	mild
77	30	female	no	n/a	n/a	n/a	n/a	n/a	non-smoker	mild
78	22	male	no	n/a	n/a	n/a	n/a	n/a	ever-smoker	mild
79	51	female	no	n/a	n/a	n/a	n/a	n/a	non-smoker	mild
80	55	female	no	n/a	n/a	n/a	n/a	n/a	non-smoker	moderate
81	40	male	no	n/a	n/a	n/a	n/a	n/a	non-smoker	mild
82	27	female	no	n/a	n/a	n/a	n/a	n/a	non-smoker	mild
83	52	male	no	n/a	n/a	n/a	n/a	n/a	ever-smoker	moderate
84	31	male	no	n/a	n/a	n/a	n/a	n/a	non-smoker	mild
85	31	male	no	n/a	n/a	n/a	n/a	n/a	non-smoker	mild
86	27	male	no	n/a	n/a	n/a	n/a	n/a	non-smoker	mild
87	50	male	yes	TRUE	n/a	n/a	n/a	n/a	non-smoker	moderate
88	21	male	no	n/a	n/a	n/a	n/a	n/a	non-smoker	mild
89	80	male	yes	TRUE	n/a	TRUE	TRUE	n/a	non-smoker	severe
90	41	male	no	n/a	n/a	n/a	n/a	n/a	non-smoker	moderate
91	37	male	no	n/a	n/a	n/a	n/a	n/a	non-smoker	mild
92	33	female	yes	n/a	n/a	n/a	TRUE	n/a	non-smoker	moderate
93	21	male	no	n/a	n/a	n/a	n/a	n/a	non-smoker	mild
94	25	female	no	n/a	n/a	n/a	n/a	n/a	non-smoker	mild
95	25	male	no	n/a	n/a	n/a	n/a	n/a	non-smoker	mild
96	55	female	no	n/a	n/a	n/a	n/a	n/a	non-smoker	severe
97	23	female	no	n/a	n/a	n/a	n/a	n/a	non-smoker	mild
98	70	female	no	n/a	n/a	n/a	n/a	n/a	non-smoker	severe
99	21	male	no	n/a	n/a	n/a	n/a	n/a	non-smoker	mild
100	60	male	no	n/a	n/a	n/a	n/a	n/a	non-smoker	severe
101	20	male	no	n/a	n/a	n/a	n/a	n/a	non-smoker	mild
102	35	male	yes	n/a	n/a	n/a	n/a	TRUE	non-smoker	severe
103	26	female	no	n/a	n/a	n/a	n/a	n/a	non-smoker	mild
104	38	male	no	n/a	n/a	n/a	n/a	n/a	non-smoker	moderate
105	48	male	yes	TRUE	n/a	n/a	n/a	n/a	ever-smoker	moderate
106	40	male	no	n/a	n/a	n/a	n/a	n/a	non-smoker	moderate
107	21	female	no	n/a	n/a	n/a	n/a	n/a	non-smoker	critical
108	26	male	no	n/a	n/a	n/a	n/a	n/a	non-smoker	mild
109	42	female	no	n/a	n/a	n/a	n/a	n/a	non-smoker	critical
110	19	male	no	n/a	n/a	n/a	n/a	n/a	non-smoker	mild
111	49	male	no	n/a	n/a	n/a	n/a	n/a	non-smoker	moderate
112	45	female	yes	n/a	TRUE	n/a	n/a	n/a	non-smoker	mild
113	60	male	yes	TRUE	n/a	n/a	n/a	n/a	ever-smoker	severe
114	41	male	no	n/a	n/a	n/a	n/a	n/a	ever-smoker	severe
115	50	male	yes	TRUE	TRUE	n/a	n/a	n/a	non-smoker	moderate
116	42	male	no	n/a	n/a	n/a	n/a	n/a	non-smoker	severe
117	29	male	no	n/a	n/a	n/a	n/a	n/a	non-smoker	mild
118	24	male	no	n/a	n/a	n/a	n/a	n/a	non-smoker	mild
119	37	female	no	n/a	n/a	n/a	n/a	n/a	non-smoker	severe
120	26	male	no	n/a	n/a	n/a	n/a	n/a	non-smoker	mild
121	20	male	no	n/a	n/a	n/a	n/a	n/a	ever-smoker	mild
122	76	male	no	n/a	n/a	n/a	n/a	n/a	ever-smoker	critical
123	65	female	yes	TRUE	n/a	n/a	n/a	n/a	non-smoker	severe
124	18	female	no	n/a	n/a	n/a	n/a	n/a	non-smoker	mild
125	30	female	no	n/a	n/a	n/a	n/a	n/a	non-smoker	moderate
126	32	male	no	n/a	n/a	n/a	n/a	n/a	ever-smoker	mild
127	22	male	no	n/a	n/a	n/a	n/a	n/a	non-smoker	mild
128	24	female	no	n/a	n/a	n/a	n/a	n/a	non-smoker	mild
129	43	male	yes	TRUE	TRUE	n/a	TRUE	n/a	non-smoker	severe
130	45	female	no	n/a	n/a	n/a	n/a	n/a	non-smoker	moderate
131	26	female	no	n/a	n/a	n/a	n/a	n/a	non-smoker	mild
132	40	female	no	n/a	n/a	n/a	n/a	n/a	non-smoker	moderate
133	35	male	no	n/a	n/a	n/a	n/a	n/a	ever-smoker	moderate
134	26	female	no	n/a	n/a	n/a	n/a	n/a	non-smoker	mild
135	30	female	no	n/a	n/a	n/a	n/a	n/a	non-smoker	moderate
136	32	female	yes	TRUE	n/a	n/a	n/a	n/a	non-smoker	moderate
137	40	female	no	n/a	n/a	n/a	n/a	n/a	non-smoker	moderate
138	20	male	no	n/a	n/a	n/a	n/a	n/a	non-smoker	mild
139	30	male	no	n/a	n/a	n/a	n/a	n/a	non-smoker	mild
140	35	male	no	n/a	n/a	n/a	n/a	n/a	non-smoker	moderate
141	35	male	no	n/a	n/a	n/a	n/a	n/a	ever-smoker	mild
142	36	male	yes	n/a	n/a	n/a	n/a	n/a	ever-smoker	mild
143	55	female	yes	TRUE	TRUE	n/a	n/a	n/a	non-smoker	moderate
144	33	female	yes	n/a	n/a	n/a	n/a	TRUE	non-smoker	moderate
145	26	male	no	n/a	n/a	n/a	n/a	n/a	non-smoker	mild
146	70	female	yes	TRUE	n/a	n/a	n/a	n/a	non-smoker	severe
147	30	female	no	n/a	n/a	n/a	n/a	n/a	non-smoker	mild
148	26	female	no	n/a	n/a	n/a	n/a	n/a	non-smoker	mild
149	50	male	yes	n/a	n/a	TRUE	n/a	n/a	ever-smoker	moderate
150	60	female	yes	TRUE	n/a	n/a	n/a	n/a	non-smoker	moderate
151	20	female	no	n/a	n/a	n/a	n/a	n/a	non-smoker	mild
152	70	female	no	n/a	n/a	n/a	n/a	n/a	non-smoker	critical
153	22	female	no	n/a	n/a	n/a	n/a	n/a	non-smoker	moderate
154	25	female	no	n/a	n/a	n/a	n/a	n/a	non-smoker	mild
155	60	female	yes	TRUE	TRUE	n/a	n/a	n/a	non-smoker	severe
156	18	female	no	n/a	n/a	n/a	n/a	n/a	non-smoker	mild
157	60	female	no	n/a	n/a	n/a	n/a	n/a	non-smoker	severe
158	30	female	no	n/a	n/a	n/a	n/a	n/a	non-smoker	mild
159	65	female	yes	TRUE	n/a	n/a	n/a	n/a	ever-smoker	severe
160	30	female	yes	TRUE	n/a	n/a	n/a	n/a	non-smoker	severe
161	30	female	no	n/a	n/a	n/a	n/a	n/a	non-smoker	mild
162	65	male	yes	TRUE	n/a	TRUE	TRUE	n/a	ever-smoker	moderate
163	23	male	no	n/a	n/a	n/a	n/a	n/a	non-smoker	mild
164	85	male	yes	n/a	TRUE	n/a	n/a	n/a	non-smoker	moderate
165	38	male	no	n/a	n/a	n/a	n/a	n/a	ever-smoker	mild
166	80	male	yes	n/a	n/a	TRUE	n/a	n/a	ever-smoker	severe
167	60	female	yes	TRUE	n/a	TRUE	n/a	n/a	non-smoker	moderate
168	28	male	no	n/a	n/a	n/a	n/a	n/a	non-smoker	mild
169	19	female	no	n/a	n/a	n/a	n/a	n/a	non-smoker	mild
170	33	female	no	n/a	n/a	n/a	n/a	n/a	non-smoker	mild
171	50	male	no	n/a	n/a	n/a	n/a	n/a	ever-smoker	moderate
172	38	female	yes	TRUE	TRUE	n/a	n/a	n/a	non-smoker	moderate
173	32	female	yes	n/a	TRUE	n/a	n/a	n/a	non-smoker	critical
174	50	male	no	n/a	n/a	n/a	n/a	n/a	non-smoker	mild
175	41	female	no	n/a	n/a	n/a	n/a	n/a	non-smoker	severe
176	28	male	no	n/a	n/a	n/a	n/a	n/a	non-smoker	mild
177	42	male	no	n/a	n/a	n/a	n/a	n/a	non-smoker	moderate
178	55	male	no	n/a	n/a	n/a	n/a	n/a	non-smoker	moderate
179	35	male	no	n/a	n/a	n/a	n/a	n/a	non-smoker	mild
180	30	female	yes	TRUE	TRUE	n/a	n/a	n/a	non-smoker	severe
181	45	male	yes	TRUE	TRUE	n/a	n/a	n/a	non-smoker	moderate
182	51	male	no	n/a	n/a	n/a	n/a	n/a	ever-smoker	moderate
183	20	male	yes	n/a	n/a	n/a	n/a	TRUE	non-smoker	moderate
184	20	female	no	n/a	n/a	n/a	n/a	n/a	non-smoker	mild
185	20	male	no	n/a	n/a	n/a	n/a	n/a	non-smoker	mild
186	30	male	yes	TRUE	n/a	n/a	n/a	n/a	non-smoker	moderate
187	21	female	no	n/a	n/a	n/a	n/a	n/a	non-smoker	moderate
188	34	male	no	n/a	n/a	n/a	n/a	n/a	non-smoker	moderate
189	20	female	no	n/a	n/a	n/a	n/a	n/a	non-smoker	mild
190	30	male	no	n/a	n/a	n/a	n/a	n/a	non-smoker	critical
191	28	female	no	n/a	n/a	n/a	n/a	n/a	non-smoker	mild
192	22	female	no	n/a	n/a	n/a	n/a	n/a	non-smoker	mild
193	35	male	no	n/a	n/a	n/a	n/a	n/a	non-smoker	moderate
194	45	male	no	n/a	n/a	n/a	n/a	n/a	non-smoker	mild
195	28	male	yes	n/a	n/a	n/a	TRUE	n/a	non-smoker	mild
196	22	male	no	n/a	n/a	n/a	n/a	n/a	non-smoker	mild
197	52	female	yes	TRUE	n/a	n/a	n/a	n/a	non-smoker	severe
198	19	male	no	n/a	n/a	n/a	n/a	n/a	non-smoker	mild
199	65	female	yes	TRUE	n/a	n/a	n/a	n/a	non-smoker	moderate
200	32	male	no	n/a	n/a	n/a	n/a	n/a	non-smoker	mild
201	36	male	no	n/a	n/a	n/a	n/a	n/a	ever-smoker	mild
202	18	female	no	n/a	n/a	n/a	n/a	n/a	non-smoker	mild
203	30	male	no	n/a	n/a	n/a	n/a	n/a	non-smoker	mild
204	80	male	yes	TRUE	n/a	TRUE	n/a	n/a	ever-smoker	critical
205	40	female	yes	n/a	TRUE	n/a	n/a	n/a	non-smoker	moderate
206	70	male	no	n/a	n/a	n/a	n/a	n/a	non-smoker	mild
207	60	female	no	n/a	n/a	n/a	n/a	n/a	non-smoker	moderate
208	38	male	yes	TRUE	n/a	n/a	n/a	n/a	non-smoker	severe
209	45	male	no	n/a	n/a	n/a	n/a	n/a	non-smoker	mild
210	34	male	no	n/a	n/a	n/a	n/a	n/a	ever-smoker	mild
211	53	male	no	n/a	n/a	n/a	n/a	n/a	ever-smoker	severe
212	80	male	no	n/a	n/a	n/a	n/a	n/a	ever-smoker	severe
213	38	female	no	n/a	n/a	n/a	n/a	n/a	non-smoker	moderate
214	24	male	no	n/a	n/a	n/a	n/a	n/a	non-smoker	mild
215	46	male	yes	n/a	TRUE	n/a	n/a	n/a	ever-smoker	moderate
216	18	female	no	n/a	n/a	n/a	n/a	n/a	non-smoker	mild
217	56	male	no	n/a	n/a	n/a	n/a	n/a	ever-smoker	moderate
218	55	female	yes	TRUE	TRUE	n/a	n/a	n/a	ever-smoker	severe
219	20	female	no	n/a	n/a	n/a	n/a	n/a	non-smoker	mild
220	34	female	no	n/a	n/a	n/a	n/a	n/a	non-smoker	severe
221	36	female	no	n/a	n/a	n/a	n/a	n/a	non-smoker	mild
222	20	male	no	n/a	n/a	n/a	n/a	n/a	non-smoker	mild
223	45	female	yes	TRUE	n/a	n/a	n/a	n/a	ever-smoker	severe
224	65	male	no	n/a	n/a	n/a	n/a	n/a	non-smoker	severe
225	30	female	yes	TRUE	n/a	n/a	n/a	n/a	non-smoker	moderate
226	18	female	no	n/a	n/a	n/a	n/a	n/a	non-smoker	moderate
227	33	male	no	n/a	n/a	n/a	n/a	n/a	non-smoker	moderate
228	55	female	no	n/a	n/a	n/a	n/a	n/a	non-smoker	moderate
229	70	male	no	n/a	n/a	n/a	n/a	n/a	ever-smoker	moderate
230	45	male	yes	n/a	n/a	n/a	n/a	n/a	ever-smoker	severe
231	51	male	no	n/a	n/a	n/a	n/a	n/a	ever-smoker	severe
232	35	male	no	n/a	n/a	n/a	n/a	n/a	ever-smoker	moderate
233	22	male	no	n/a	n/a	n/a	n/a	n/a	non-smoker	mild
234	49	male	no	n/a	n/a	n/a	n/a	n/a	non-smoker	moderate
235	38	male	no	n/a	n/a	n/a	n/a	n/a	non-smoker	mild
236	30	female	no	n/a	n/a	n/a	n/a	n/a	non-smoker	moderate
237	32	male	yes	n/a	TRUE	n/a	n/a	n/a	non-smoker	severe
238	19	female	no	n/a	n/a	n/a	n/a	n/a	non-smoker	mild
239	29	female	no	n/a	n/a	n/a	n/a	n/a	non-smoker	moderate
240	45	male	no	n/a	n/a	n/a	n/a	n/a	non-smoker	moderate
241	70	male	yes	n/a	n/a	TRUE	n/a	n/a	non-smoker	severe
242	38	female	no	n/a	n/a	n/a	n/a	n/a	non-smoker	mild
243	59	male	no	n/a	n/a	n/a	n/a	n/a	non-smoker	severe
244	33	male	no	n/a	n/a	n/a	n/a	n/a	non-smoker	mild
245	45	male	no	n/a	n/a	n/a	n/a	n/a	non-smoker	mild
246	24	male	no	n/a	n/a	n/a	n/a	n/a	non-smoker	moderate
247	65	male	yes	TRUE	TRUE	n/a	n/a	n/a	non-smoker	severe
248	23	male	no	n/a	n/a	n/a	n/a	n/a	non-smoker	mild
249	26	male	no	n/a	n/a	n/a	n/a	n/a	non-smoker	mild
250	46	male	no	n/a	n/a	n/a	n/a	n/a	non-smoker	moderate
251	62	male	yes	n/a	TRUE	n/a	n/a	n/a	non-smoker	moderate
252	26	female	no	n/a	n/a	n/a	n/a	n/a	non-smoker	mild
253	22	female	no	n/a	n/a	n/a	n/a	n/a	non-smoker	mild
254	48	female	no	n/a	n/a	n/a	n/a	n/a	non-smoker	mild
255	56	male	yes	TRUE	TRUE	TRUE	n/a	n/a	non-smoker	critical
256	35	female	no	n/a	n/a	n/a	n/a	n/a	non-smoker	severe
257	27	female	no	n/a	n/a	n/a	n/a	n/a	non-smoker	moderate
258	19	female	no	n/a	n/a	n/a	n/a	n/a	non-smoker	mild
259	20	female	no	n/a	n/a	n/a	n/a	n/a	non-smoker	mild
260	21	female	no	n/a	n/a	n/a	n/a	n/a	non-smoker	mild
261	58	male	yes	TRUE	n/a	TRUE	n/a	n/a	non-smoker	moderate
262	48	male	no	n/a	n/a	n/a	n/a	n/a	non-smoker	mild
263	40	female	no	n/a	n/a	n/a	n/a	n/a	non-smoker	severe
264	45	male	no	n/a	n/a	n/a	n/a	n/a	ever-smoker	mild
265	30	male	no	n/a	n/a	n/a	n/a	n/a	non-smoker	moderate
266	35	male	no	n/a	n/a	n/a	n/a	n/a	non-smoker	severe
267	45	female	no	n/a	n/a	n/a	n/a	n/a	non-smoker	moderate
268	25	female	no	n/a	n/a	n/a	n/a	n/a	non-smoker	mild
269	46	male	no	n/a	n/a	n/a	n/a	n/a	non-smoker	moderate
270	65	male	no	n/a	n/a	n/a	n/a	n/a	non-smoker	moderate
271	47	female	no	n/a	n/a	n/a	n/a	n/a	non-smoker	mild
272	20	female	no	n/a	n/a	n/a	n/a	n/a	non-smoker	moderate
273	36	male	no	n/a	n/a	n/a	n/a	n/a	non-smoker	mild
274	51	female	yes	TRUE	TRUE	n/a	n/a	n/a	non-smoker	moderate
275	50	female	yes	TRUE	TRUE	n/a	n/a	n/a	non-smoker	critical
276	50	male	no	n/a	n/a	n/a	n/a	n/a	non-smoker	moderate
277	50	male	yes	n/a	n/a	TRUE	n/a	n/a	non-smoker	mild
278	64	male	no	n/a	n/a	n/a	n/a	n/a	non-smoker	severe
279	23	male	no	n/a	n/a	n/a	n/a	n/a	non-smoker	mild
280	36	male	no	n/a	n/a	n/a	n/a	n/a	non-smoker	mild
281	36	male	no	n/a	n/a	n/a	n/a	n/a	ever-smoker	mild
282	24	female	no	n/a	n/a	n/a	n/a	n/a	non-smoker	severe
283	70	male	no	n/a	n/a	n/a	n/a	n/a	ever-smoker	severe
284	51	female	yes	TRUE	TRUE	n/a	n/a	n/a	non-smoker	moderate
285	45	male	yes	n/a	TRUE	n/a	n/a	n/a	ever-smoker	severe
286	45	male	no	n/a	n/a	n/a	n/a	n/a	ever-smoker	mild
287	27	male	no	n/a	n/a	n/a	n/a	n/a	non-smoker	mild
288	30	male	no	n/a	n/a	n/a	n/a	n/a	non-smoker	moderate
289	40	male	no	n/a	n/a	n/a	n/a	n/a	non-smoker	critical
290	23	female	no	n/a	n/a	n/a	n/a	n/a	non-smoker	moderate
291	37	female	no	n/a	n/a	n/a	n/a	n/a	non-smoker	severe
292	35	female	no	n/a	n/a	n/a	n/a	n/a	non-smoker	mild
293	65	male	yes	TRUE	n/a	TRUE	n/a	n/a	ever-smoker	moderate
294	70	male	yes	TRUE	n/a	n/a	TRUE	n/a	non-smoker	severe
295	30	female	no	n/a	n/a	n/a	n/a	n/a	non-smoker	severe
296	34	male	no	n/a	n/a	n/a	n/a	n/a	non-smoker	moderate
297	18	male	no	n/a	n/a	n/a	n/a	n/a	non-smoker	mild
298	57	female	yes	TRUE	TRUE	n/a	TRUE	n/a	non-smoker	severe
299	73	male	no	n/a	n/a	n/a	n/a	n/a	non-smoker	severe
300	21	female	no	n/a	n/a	n/a	n/a	n/a	non-smoker	mild
301	34	male	no	n/a	n/a	n/a	n/a	n/a	non-smoker	mild
302	70	female	yes	TRUE	n/a	TRUE	n/a	n/a	non-smoker	moderate
303	44	male	yes	n/a	TRUE	n/a	n/a	n/a	non-smoker	moderate
304	63	male	yes	TRUE	TRUE	n/a	n/a	n/a	non-smoker	moderate
305	45	female	yes	TRUE	n/a	n/a	n/a	n/a	non-smoker	severe
306	34	male	no	n/a	n/a	n/a	n/a	n/a	non-smoker	moderate
307	25	male	no	n/a	n/a	n/a	n/a	n/a	non-smoker	mild
308	38	female	no	n/a	n/a	n/a	n/a	n/a	non-smoker	severe
309	70	female	yes	n/a	n/a	n/a	n/a	n/a	ever-smoker	severe
310	50	female	yes	TRUE	TRUE	n/a	n/a	n/a	non-smoker	moderate
311	40	male	no	n/a	n/a	n/a	n/a	n/a	non-smoker	severe
312	30	female	yes	n/a	TRUE	n/a	n/a	n/a	non-smoker	moderate
313	37	female	no	n/a	n/a	n/a	n/a	n/a	ever-smoker	severe
314	35	female	no	n/a	n/a	n/a	n/a	n/a	non-smoker	severe
315	27	female	no	n/a	n/a	n/a	n/a	n/a	non-smoker	moderate
316	18	male	no	n/a	n/a	n/a	n/a	n/a	non-smoker	mild
317	28	male	no	n/a	n/a	n/a	n/a	n/a	non-smoker	mild
318	35	male	no	n/a	n/a	n/a	n/a	n/a	non-smoker	moderate
319	19	female	no	n/a	n/a	n/a	n/a	n/a	non-smoker	mild
320	50	female	yes	TRUE	TRUE	n/a	TRUE	n/a	non-smoker	severe
321	24	male	no	n/a	n/a	n/a	n/a	n/a	ever-smoker	mild
322	36	female	no	n/a	n/a	n/a	n/a	n/a	non-smoker	mild
323	70	male	no	n/a	n/a	n/a	n/a	n/a	ever-smoker	moderate
324	25	female	no	n/a	n/a	n/a	n/a	n/a	non-smoker	mild
325	40	female	no	n/a	n/a	n/a	n/a	n/a	non-smoker	mild
326	26	female	no	n/a	n/a	n/a	n/a	n/a	non-smoker	mild
327	47	female	yes	TRUE	TRUE	n/a	n/a	n/a	non-smoker	moderate
328	25	male	no	n/a	n/a	n/a	n/a	n/a	non-smoker	mild
329	68	male	no	n/a	n/a	n/a	n/a	n/a	non-smoker	severe
330	80	female	no	n/a	n/a	n/a	n/a	n/a	non-smoker	moderate
331	60	female	no	n/a	n/a	n/a	n/a	n/a	non-smoker	moderate
332	35	female	yes	TRUE	TRUE	n/a	n/a	n/a	non-smoker	severe
333	29	female	yes	n/a	n/a	n/a	n/a	TRUE	non-smoker	moderate
334	70	female	yes	TRUE	n/a	n/a	n/a	n/a	ever-smoker	moderate
335	56	male	yes	TRUE	n/a	n/a	n/a	n/a	ever-smoker	moderate
336	20	male	no	n/a	n/a	n/a	n/a	n/a	non-smoker	mild
337	50	female	no	n/a	n/a	n/a	n/a	n/a	non-smoker	moderate
338	21	female	yes	n/a	n/a	n/a	n/a	n/a	non-smoker	moderate
339	80	male	no	n/a	n/a	n/a	n/a	n/a	ever-smoker	severe
340	40	male	no	n/a	n/a	n/a	n/a	n/a	ever-smoker	severe
341	29	male	no	n/a	n/a	n/a	n/a	n/a	ever-smoker	mild
342	30	male	no	n/a	n/a	n/a	n/a	n/a	non-smoker	moderate
343	59	female	yes	TRUE	n/a	n/a	n/a	n/a	non-smoker	moderate
344	35	female	yes	TRUE	n/a	n/a	TRUE	n/a	non-smoker	severe
345	46	male	no	n/a	n/a	n/a	n/a	n/a	non-smoker	severe
346	38	female	yes	n/a	TRUE	n/a	n/a	n/a	non-smoker	severe
347	45	female	yes	TRUE	TRUE	n/a	n/a	n/a	non-smoker	critical
348	36	male	yes	TRUE	n/a	n/a	n/a	n/a	non-smoker	moderate
349	72	female	yes	n/a	TRUE	TRUE	TRUE	n/a	ever-smoker	critical
350	70	male	yes	n/a	n/a	TRUE	n/a	n/a	non-smoker	critical
351	51	male	no	n/a	n/a	n/a	n/a	n/a	non-smoker	moderate
352	26	male	no	n/a	n/a	n/a	n/a	n/a	non-smoker	mild
353	52	male	no	n/a	n/a	n/a	n/a	n/a	non-smoker	critical
354	50	male	no	n/a	n/a	n/a	n/a	n/a	ever-smoker	severe
355	35	male	no	n/a	n/a	n/a	n/a	n/a	non-smoker	mild
356	32	male	no	n/a	n/a	n/a	n/a	n/a	non-smoker	mild
357	25	female	no	n/a	n/a	n/a	n/a	n/a	ever-smoker	mild
358	31	male	no	n/a	n/a	n/a	n/a	n/a	non-smoker	mild
359	60	male	yes	TRUE	TRUE	n/a	n/a	n/a	non-smoker	severe
360	50	female	yes	TRUE	n/a	n/a	n/a	n/a	non-smoker	severe
361	25	female	no	n/a	n/a	n/a	n/a	n/a	non-smoker	mild
362	42	female	no	n/a	n/a	n/a	n/a	n/a	non-smoker	mild
363	46	female	yes	TRUE	TRUE	n/a	n/a	n/a	non-smoker	moderate
364	24	female	no	n/a	n/a	n/a	n/a	n/a	non-smoker	mild
365	68	female	no	n/a	n/a	n/a	n/a	n/a	non-smoker	severe
366	35	male	yes	n/a	TRUE	n/a	n/a	n/a	non-smoker	moderate
367	30	male	no	n/a	n/a	n/a	n/a	n/a	non-smoker	mild
368	65	male	yes	TRUE	TRUE	TRUE	n/a	n/a	ever-smoker	severe
369	55	female	yes	TRUE	TRUE	n/a	n/a	n/a	non-smoker	moderate
370	31	male	no	n/a	n/a	n/a	n/a	n/a	non-smoker	mild
371	38	female	yes	TRUE	n/a	n/a	n/a	TRUE	non-smoker	severe
372	35	male	no	n/a	n/a	n/a	n/a	n/a	non-smoker	mild
373	45	female	no	n/a	n/a	n/a	n/a	n/a	non-smoker	severe
374	32	male	no	n/a	n/a	n/a	n/a	n/a	non-smoker	moderate
375	48	male	yes	n/a	TRUE	n/a	n/a	n/a	non-smoker	moderate
376	47	male	yes	TRUE	n/a	n/a	n/a	n/a	ever-smoker	mild
377	43	male	no	n/a	n/a	n/a	n/a	n/a	non-smoker	mild
378	28	female	yes	n/a	n/a	n/a	n/a	TRUE	non-smoker	mild
379	26	male	no	n/a	n/a	n/a	n/a	n/a	non-smoker	mild
380	62	male	yes	TRUE	TRUE	n/a	n/a	n/a	non-smoker	severe
381	30	male	yes	n/a	TRUE	n/a	n/a	n/a	ever-smoker	moderate
382	61	male	yes	n/a	n/a	TRUE	n/a	n/a	non-smoker	moderate
383	31	male	no	n/a	n/a	n/a	n/a	n/a	non-smoker	severe
384	55	male	no	n/a	n/a	n/a	n/a	n/a	non-smoker	severe
385	65	male	no	n/a	n/a	n/a	n/a	n/a	ever-smoker	moderate
386	40	female	no	n/a	n/a	n/a	n/a	n/a	non-smoker	moderate
387	29	female	no	n/a	n/a	n/a	n/a	n/a	non-smoker	mild
388	53	male	yes	TRUE	TRUE	TRUE	TRUE	n/a	ever-smoker	moderate
389	45	male	no	n/a	n/a	n/a	n/a	n/a	non-smoker	mild
390	65	female	yes	TRUE	n/a	n/a	n/a	n/a	non-smoker	severe
391	39	male	yes	TRUE	TRUE	n/a	n/a	n/a	non-smoker	moderate
392	68	male	yes	TRUE	n/a	n/a	n/a	n/a	ever-smoker	moderate
393	40	female	yes	n/a	TRUE	n/a	n/a	n/a	non-smoker	severe
394	20	female	no	n/a	n/a	n/a	n/a	n/a	non-smoker	severe
395	30	male	yes	n/a	n/a	n/a	n/a	TRUE	ever-smoker	severe
396	50	female	no	n/a	n/a	n/a	n/a	n/a	non-smoker	severe
397	65	male	yes	n/a	n/a	n/a	n/a	TRUE	ever-smoker	severe
398	40	male	yes	TRUE	TRUE	n/a	n/a	n/a	non-smoker	severe
399	50	female	yes	TRUE	n/a	n/a	n/a	n/a	non-smoker	severe
400	45	female	no	n/a	n/a	n/a	n/a	n/a	non-smoker	severe
401	30	female	no	n/a	n/a	n/a	n/a	n/a	non-smoker	moderate
402	43	male	yes	TRUE	n/a	n/a	n/a	n/a	non-smoker	moderate
403	50	male	no	n/a	n/a	n/a	n/a	n/a	non-smoker	severe
404	21	female	no	n/a	n/a	n/a	n/a	n/a	non-smoker	moderate
405	20	male	no	n/a	n/a	n/a	n/a	n/a	non-smoker	severe
406	37	female	yes	n/a	TRUE	n/a	n/a	n/a	non-smoker	moderate
407	41	female	yes	TRUE	n/a	n/a	n/a	n/a	non-smoker	severe
408	50	female	yes	TRUE	TRUE	n/a	n/a	n/a	non-smoker	moderate
409	40	female	no	n/a	n/a	n/a	n/a	n/a	non-smoker	severe
410	22	female	no	n/a	n/a	n/a	n/a	n/a	non-smoker	mild
411	50	female	yes	n/a	TRUE	n/a	n/a	n/a	non-smoker	moderate
412	48	male	no	n/a	n/a	n/a	n/a	n/a	non-smoker	severe
413	31	female	no	n/a	n/a	n/a	n/a	n/a	non-smoker	mild
414	40	female	yes	TRUE	TRUE	n/a	n/a	n/a	non-smoker	moderate
415	39	female	yes	n/a	TRUE	n/a	n/a	n/a	non-smoker	severe
416	32	male	no	n/a	n/a	n/a	n/a	n/a	non-smoker	mild
417	55	female	yes	TRUE	TRUE	n/a	n/a	n/a	non-smoker	severe
418	51	male	yes	TRUE	n/a	n/a	n/a	n/a	ever-smoker	moderate
419	70	female	yes	TRUE	TRUE	n/a	n/a	n/a	non-smoker	critical
420	87	male	no	n/a	n/a	n/a	n/a	n/a	non-smoker	severe
421	22	female	no	n/a	n/a	n/a	n/a	n/a	non-smoker	mild
422	30	female	yes	TRUE	n/a	n/a	n/a	TRUE	non-smoker	moderate
423	70	male	yes	TRUE	n/a	n/a	TRUE	TRUE	non-smoker	moderate
424	55	female	yes	TRUE	TRUE	n/a	n/a	n/a	non-smoker	moderate
425	26	female	no	n/a	n/a	n/a	n/a	n/a	non-smoker	moderate
426	28	male	no	n/a	n/a	n/a	n/a	n/a	ever-smoker	moderate
427	32	male	no	n/a	n/a	n/a	n/a	n/a	non-smoker	moderate
428	27	female	yes	n/a	TRUE	n/a	n/a	n/a	non-smoker	mild
429	26	female	no	n/a	n/a	n/a	n/a	n/a	non-smoker	mild
430	56	male	yes	TRUE	TRUE	n/a	n/a	n/a	ever-smoker	severe
431	80	female	yes	TRUE	n/a	TRUE	n/a	n/a	non-smoker	moderate
432	22	female	no	n/a	n/a	n/a	n/a	n/a	non-smoker	mild
433	45	female	no	n/a	n/a	n/a	n/a	n/a	non-smoker	moderate
434	44	female	yes	TRUE	TRUE	n/a	n/a	n/a	non-smoker	moderate
435	34	female	no	n/a	n/a	n/a	n/a	n/a	non-smoker	mild
436	68	male	no	n/a	n/a	n/a	n/a	n/a	non-smoker	severe
437	26	female	no	n/a	n/a	n/a	n/a	n/a	non-smoker	mild
438	40	male	no	n/a	n/a	n/a	n/a	n/a	non-smoker	mild
439	38	female	no	n/a	n/a	n/a	n/a	n/a	non-smoker	moderate
440	92	male	yes	TRUE	TRUE	n/a	n/a	n/a	non-smoker	critical
441	53	female	yes	TRUE	n/a	n/a	n/a	n/a	non-smoker	moderate
442	65	male	no	n/a	n/a	n/a	n/a	n/a	non-smoker	critical
443	21	male	no	n/a	n/a	n/a	n/a	n/a	non-smoker	mild
444	48	male	no	n/a	n/a	n/a	n/a	n/a	ever-smoker	severe
445	65	female	yes	TRUE	n/a	TRUE	TRUE	n/a	ever-smoker	critical
446	57	female	no	n/a	n/a	n/a	n/a	n/a	non-smoker	moderate
447	65	male	yes	TRUE	n/a	n/a	n/a	n/a	ever-smoker	moderate
448	65	male	no	n/a	n/a	n/a	n/a	n/a	non-smoker	moderate
449	48	female	yes	TRUE	n/a	n/a	n/a	n/a	non-smoker	severe
450	18	female	yes	n/a	n/a	n/a	TRUE	n/a	non-smoker	moderate
451	60	female	no	n/a	n/a	n/a	n/a	n/a	ever-smoker	severe
452	20	female	no	n/a	n/a	n/a	n/a	n/a	non-smoker	moderate
453	50	female	yes	TRUE	n/a	TRUE	n/a	n/a	ever-smoker	severe
454	50	female	yes	TRUE	n/a	n/a	n/a	n/a	non-smoker	mild
455	40	female	yes	TRUE	n/a	n/a	n/a	n/a	non-smoker	severe
456	50	male	no	n/a	n/a	n/a	n/a	n/a	ever-smoker	moderate
457	19	male	no	n/a	n/a	n/a	n/a	n/a	non-smoker	moderate
458	70	female	no	n/a	n/a	n/a	n/a	n/a	non-smoker	critical
459	22	male	no	n/a	n/a	n/a	n/a	n/a	non-smoker	mild
460	38	female	yes	n/a	TRUE	n/a	n/a	n/a	non-smoker	severe
461	38	male	no	n/a	n/a	n/a	n/a	n/a	non-smoker	severe
462	45	female	yes	n/a	TRUE	n/a	n/a	n/a	non-smoker	critical
463	35	female	yes	TRUE	TRUE	n/a	n/a	n/a	non-smoker	severe
464	30	female	yes	TRUE	TRUE	n/a	n/a	n/a	non-smoker	severe
465	38	female	yes	n/a	TRUE	n/a	n/a	n/a	non-smoker	moderate
466	72	male	yes	n/a	n/a	TRUE	n/a	n/a	ever-smoker	severe
467	23	male	no	n/a	n/a	n/a	n/a	n/a	non-smoker	mild
468	40	female	no	n/a	n/a	n/a	n/a	n/a	non-smoker	moderate
469	18	female	no	n/a	n/a	n/a	n/a	n/a	non-smoker	mild
470	40	female	no	n/a	n/a	n/a	n/a	n/a	non-smoker	moderate
471	25	female	no	n/a	n/a	n/a	n/a	n/a	non-smoker	mild
472	34	female	no	n/a	n/a	n/a	n/a	n/a	non-smoker	severe
473	65	male	no	n/a	n/a	n/a	n/a	n/a	ever-smoker	mild
474	22	male	no	n/a	n/a	n/a	n/a	n/a	non-smoker	mild
475	18	female	no	n/a	n/a	n/a	n/a	n/a	non-smoker	mild
476	35	female	no	n/a	n/a	n/a	n/a	n/a	non-smoker	mild
477	30	female	no	n/a	n/a	n/a	n/a	n/a	non-smoker	mild
478	50	female	yes	TRUE	n/a	n/a	n/a	n/a	non-smoker	mild
479	50	female	yes	TRUE	n/a	n/a	n/a	n/a	non-smoker	mild
480	55	male	no	n/a	n/a	n/a	n/a	n/a	non-smoker	mild
481	67	male	no	n/a	n/a	n/a	n/a	n/a	ever-smoker	moderate
482	35	female	no	n/a	n/a	n/a	n/a	n/a	non-smoker	mild
483	35	male	no	n/a	n/a	n/a	n/a	n/a	non-smoker	mild
484	30	male	no	n/a	n/a	n/a	n/a	n/a	non-smoker	mild
485	55	female	yes	n/a	n/a	TRUE	n/a	n/a	non-smoker	mild
486	50	female	yes	TRUE	n/a	n/a	n/a	n/a	ever-smoker	severe
487	50	female	yes	TRUE	n/a	n/a	n/a	n/a	non-smoker	severe
488	32	male	yes	TRUE	TRUE	n/a	n/a	n/a	ever-smoker	moderate
489	53	male	yes	n/a	TRUE	n/a	n/a	n/a	non-smoker	severe
490	35	female	no	n/a	n/a	n/a	n/a	n/a	ever-smoker	mild
491	32	male	no	n/a	n/a	n/a	n/a	n/a	ever-smoker	mild
492	50	female	yes	TRUE	n/a	n/a	n/a	n/a	non-smoker	moderate
493	38	female	no	n/a	n/a	n/a	n/a	n/a	non-smoker	moderate
494	42	female	no	n/a	n/a	n/a	n/a	n/a	non-smoker	severe
495	30	male	no	n/a	n/a	n/a	n/a	n/a	non-smoker	mild
496	36	female	yes	TRUE	n/a	n/a	n/a	n/a	non-smoker	moderate
497	25	male	no	n/a	n/a	n/a	n/a	n/a	ever-smoker	mild
498	19	male	no	n/a	n/a	n/a	n/a	n/a	non-smoker	mild
499	60	female	yes	n/a	n/a	n/a	TRUE	n/a	ever-smoker	moderate
500	70	male	no	n/a	n/a	n/a	n/a	n/a	non-smoker	moderate
501	41	male	no	n/a	n/a	n/a	n/a	n/a	ever-smoker	moderate
502	65	female	no	n/a	n/a	n/a	n/a	n/a	non-smoker	moderate
503	35	female	no	n/a	n/a	n/a	n/a	n/a	non-smoker	mild
504	18	male	no	n/a	n/a	n/a	n/a	n/a	non-smoker	mild
505	28	female	no	n/a	n/a	n/a	n/a	n/a	non-smoker	mild
506	32	male	no	n/a	n/a	n/a	n/a	n/a	non-smoker	mild
507	33	male	no	n/a	n/a	n/a	n/a	n/a	ever-smoker	mild
508	25	female	no	n/a	n/a	n/a	n/a	n/a	non-smoker	mild
509	81	male	no	n/a	n/a	n/a	n/a	n/a	non-smoker	severe
510	38	male	no	n/a	n/a	n/a	n/a	n/a	non-smoker	mild
511	40	female	no	n/a	n/a	n/a	n/a	n/a	non-smoker	mild
512	40	female	no	n/a	n/a	n/a	n/a	n/a	non-smoker	critical
513	30	female	yes	n/a	TRUE	n/a	n/a	n/a	non-smoker	severe
514	70	male	yes	n/a	n/a	TRUE	n/a	n/a	ever-smoker	severe
515	38	female	yes	n/a	TRUE	n/a	n/a	n/a	non-smoker	severe
516	60	male	yes	n/a	n/a	TRUE	n/a	n/a	ever-smoker	moderate
517	55	female	no	n/a	n/a	n/a	n/a	n/a	non-smoker	moderate
518	55	female	yes	TRUE	TRUE	n/a	TRUE	n/a	non-smoker	severe
519	25	male	no	n/a	n/a	n/a	n/a	n/a	non-smoker	mild
520	27	female	no	n/a	n/a	n/a	n/a	n/a	non-smoker	mild
521	32	female	no	n/a	n/a	n/a	n/a	n/a	non-smoker	mild
522	22	female	no	n/a	n/a	n/a	n/a	n/a	non-smoker	mild
523	71	female	yes	TRUE	TRUE	n/a	n/a	n/a	non-smoker	critical
524	21	female	no	n/a	n/a	n/a	n/a	n/a	non-smoker	mild
525	35	male	yes	TRUE	TRUE	n/a	n/a	n/a	ever-smoker	moderate
526	65	female	yes	TRUE	TRUE	n/a	n/a	n/a	non-smoker	moderate
527	20	female	no	n/a	n/a	n/a	n/a	n/a	non-smoker	mild
528	40	female	no	n/a	n/a	n/a	n/a	n/a	non-smoker	severe
529	28	male	no	n/a	n/a	n/a	n/a	n/a	non-smoker	mild
530	26	female	no	n/a	n/a	n/a	n/a	n/a	non-smoker	mild
531	29	female	no	n/a	n/a	n/a	n/a	n/a	non-smoker	moderate
532	21	female	no	n/a	n/a	n/a	n/a	n/a	non-smoker	moderate
533	35	female	no	n/a	n/a	n/a	n/a	n/a	non-smoker	moderate
534	49	male	no	n/a	n/a	n/a	n/a	n/a	non-smoker	severe
535	65	female	no	n/a	n/a	n/a	n/a	n/a	non-smoker	mild
536	28	female	yes	TRUE	TRUE	n/a	n/a	n/a	non-smoker	moderate
537	35	female	yes	n/a	TRUE	n/a	n/a	n/a	non-smoker	moderate
538	41	male	no	n/a	n/a	n/a	n/a	n/a	non-smoker	mild
539	31	male	no	n/a	n/a	n/a	n/a	n/a	non-smoker	mild
540	45	female	yes	TRUE	TRUE	n/a	TRUE	n/a	non-smoker	severe
541	18	female	no	n/a	n/a	n/a	n/a	n/a	non-smoker	mild
542	45	female	no	n/a	n/a	n/a	n/a	n/a	non-smoker	moderate
543	24	male	no	n/a	n/a	n/a	n/a	n/a	non-smoker	mild
544	60	female	no	n/a	n/a	n/a	n/a	n/a	ever-smoker	moderate
545	33	male	no	n/a	n/a	n/a	n/a	n/a	ever-smoker	mild
546	24	female	no	n/a	n/a	n/a	n/a	n/a	non-smoker	mild
547	40	female	no	n/a	n/a	n/a	n/a	n/a	non-smoker	mild
548	38	female	no	n/a	n/a	n/a	n/a	n/a	non-smoker	mild
549	40	male	no	n/a	n/a	n/a	n/a	n/a	non-smoker	moderate
550	42	female	no	n/a	n/a	n/a	n/a	n/a	non-smoker	severe
551	47	female	no	n/a	n/a	n/a	n/a	n/a	non-smoker	moderate
552	25	female	no	n/a	n/a	n/a	n/a	n/a	non-smoker	mild
553	55	male	no	n/a	n/a	n/a	n/a	n/a	non-smoker	moderate
554	32	female	no	n/a	n/a	n/a	n/a	n/a	non-smoker	moderate
555	68	male	yes	TRUE	TRUE	n/a	n/a	n/a	non-smoker	severe
556	55	female	yes	TRUE	TRUE	n/a	n/a	n/a	non-smoker	mild
557	65	male	yes	n/a	n/a	n/a	n/a	n/a	ever-smoker	moderate
558	25	female	yes	TRUE	n/a	n/a	n/a	n/a	non-smoker	mild
559	20	female	no	n/a	n/a	n/a	n/a	n/a	non-smoker	mild
560	32	male	no	n/a	n/a	n/a	n/a	n/a	non-smoker	mild
561	50	female	no	n/a	n/a	n/a	n/a	n/a	ever-smoker	mild
562	27	male	no	n/a	n/a	n/a	n/a	n/a	non-smoker	mild
563	32	male	no	n/a	n/a	n/a	n/a	n/a	non-smoker	mild
564	83	male	yes	TRUE	n/a	TRUE	n/a	n/a	ever-smoker	severe
565	60	female	yes	TRUE	n/a	n/a	n/a	n/a	non-smoker	severe
566	35	male	no	n/a	n/a	n/a	n/a	n/a	non-smoker	mild
567	45	male	no	n/a	n/a	n/a	n/a	n/a	ever-smoker	moderate
568	60	female	yes	TRUE	TRUE	n/a	n/a	n/a	non-smoker	moderate
569	60	male	no	n/a	n/a	n/a	n/a	n/a	ever-smoker	severe
570	60	female	yes	TRUE	n/a	TRUE	TRUE	n/a	non-smoker	moderate
571	21	male	no	n/a	n/a	n/a	n/a	n/a	non-smoker	mild
572	42	male	no	n/a	n/a	n/a	n/a	n/a	ever-smoker	mild
573	37	female	no	n/a	n/a	n/a	n/a	n/a	non-smoker	mild
574	27	female	no	n/a	n/a	n/a	n/a	n/a	ever-smoker	mild
575	42	male	no	n/a	n/a	n/a	n/a	n/a	ever-smoker	mild
576	62	male	yes	TRUE	n/a	n/a	TRUE	n/a	ever-smoker	mild
577	52	male	no	n/a	n/a	n/a	n/a	n/a	ever-smoker	moderate
578	24	male	no	n/a	n/a	n/a	n/a	n/a	non-smoker	mild
579	27	male	no	n/a	n/a	n/a	n/a	n/a	non-smoker	severe
580	40	female	no	n/a	n/a	n/a	n/a	n/a	non-smoker	mild
581	21	female	yes	n/a	n/a	n/a	n/a	TRUE	non-smoker	mild
582	21	male	no	n/a	n/a	n/a	n/a	n/a	non-smoker	mild
583	30	male	no	n/a	n/a	n/a	n/a	n/a	non-smoker	mild
584	50	female	yes	TRUE	TRUE	n/a	n/a	n/a	non-smoker	moderate
585	45	female	no	n/a	n/a	n/a	n/a	n/a	non-smoker	mild
586	28	male	no	n/a	n/a	n/a	n/a	n/a	ever-smoker	mild
587	49	female	no	n/a	n/a	n/a	n/a	n/a	non-smoker	moderate
588	70	female	yes	TRUE	n/a	n/a	n/a	n/a	non-smoker	severe
589	40	female	no	n/a	n/a	n/a	n/a	n/a	non-smoker	mild
590	28	female	no	n/a	n/a	n/a	n/a	n/a	non-smoker	mild
591	28	male	no	n/a	n/a	n/a	n/a	n/a	ever-smoker	mild
592	22	male	no	n/a	n/a	n/a	n/a	n/a	non-smoker	mild
593	65	female	yes	TRUE	n/a	TRUE	n/a	n/a	non-smoker	moderate
594	30	male	no	n/a	n/a	n/a	n/a	n/a	ever-smoker	mild
595	30	male	no	n/a	n/a	n/a	n/a	n/a	non-smoker	mild
596	20	female	no	n/a	n/a	n/a	n/a	n/a	non-smoker	mild
597	40	male	no	n/a	n/a	n/a	n/a	n/a	ever-smoker	mild
598	26	male	no	n/a	n/a	n/a	n/a	n/a	non-smoker	mild
599	29	male	no	n/a	n/a	n/a	n/a	n/a	non-smoker	mild
600	49	male	yes	TRUE	TRUE	n/a	n/a	n/a	ever-smoker	moderate
601	35	female	no	n/a	n/a	n/a	n/a	n/a	non-smoker	mild
602	28	female	no	n/a	n/a	n/a	n/a	n/a	non-smoker	mild
603	78	female	yes	TRUE	TRUE	n/a	TRUE	n/a	non-smoker	moderate
604	62	male	yes	n/a	TRUE	n/a	n/a	n/a	ever-smoker	moderate
605	40	male	yes	n/a	TRUE	n/a	n/a	n/a	non-smoker	moderate
606	55	male	no	n/a	n/a	n/a	n/a	n/a	ever-smoker	mild
607	63	male	yes	n/a	n/a	TRUE	n/a	n/a	non-smoker	moderate
608	42	male	no	n/a	n/a	n/a	n/a	n/a	non-smoker	mild
609	18	female	no	n/a	n/a	n/a	n/a	n/a	non-smoker	mild
610	35	male	no	n/a	n/a	n/a	n/a	n/a	non-smoker	mild
611	28	male	no	n/a	n/a	n/a	n/a	n/a	non-smoker	mild
612	55	female	yes	n/a	n/a	TRUE	n/a	n/a	non-smoker	severe
613	23	female	no	n/a	n/a	n/a	n/a	n/a	non-smoker	mild
614	55	male	yes	TRUE	n/a	n/a	n/a	n/a	non-smoker	moderate
615	42	male	yes	n/a	n/a	n/a	n/a	n/a	ever-smoker	critical
616	40	female	yes	TRUE	n/a	n/a	n/a	n/a	non-smoker	moderate
617	60	female	yes	n/a	TRUE	TRUE	TRUE	n/a	ever-smoker	moderate
618	20	female	no	n/a	n/a	n/a	n/a	n/a	non-smoker	severe
619	38	male	no	n/a	n/a	n/a	n/a	n/a	ever-smoker	mild
620	52	male	no	n/a	n/a	n/a	n/a	n/a	ever-smoker	moderate
621	30	male	no	n/a	n/a	n/a	n/a	n/a	non-smoker	mild
622	50	female	no	n/a	n/a	n/a	n/a	n/a	non-smoker	mild
623	27	female	yes	n/a	n/a	n/a	n/a	TRUE	non-smoker	severe
624	28	female	no	n/a	n/a	n/a	n/a	n/a	non-smoker	mild
625	28	male	no	n/a	n/a	n/a	n/a	n/a	non-smoker	mild
626	22	male	no	n/a	n/a	n/a	n/a	n/a	non-smoker	mild
627	36	female	no	n/a	n/a	n/a	n/a	n/a	non-smoker	moderate
628	23	female	no	n/a	n/a	n/a	n/a	n/a	non-smoker	mild
629	20	female	no	n/a	n/a	n/a	n/a	n/a	non-smoker	mild
630	60	male	no	n/a	n/a	n/a	n/a	n/a	ever-smoker	mild
631	75	female	yes	n/a	n/a	TRUE	n/a	n/a	non-smoker	moderate
632	30	male	no	n/a	n/a	n/a	n/a	n/a	non-smoker	mild
633	55	male	yes	n/a	n/a	TRUE	n/a	n/a	non-smoker	severe
634	50	female	yes	n/a	n/a	TRUE	n/a	n/a	ever-smoker	severe
635	37	male	no	n/a	n/a	n/a	n/a	n/a	non-smoker	mild
636	32	female	no	n/a	n/a	n/a	n/a	n/a	non-smoker	mild
637	22	female	no	n/a	n/a	n/a	n/a	n/a	non-smoker	mild
638	30	female	no	n/a	n/a	n/a	n/a	n/a	non-smoker	mild
639	24	male	no	n/a	n/a	n/a	n/a	n/a	non-smoker	mild
640	18	female	no	n/a	n/a	n/a	n/a	n/a	non-smoker	mild
641	31	male	no	n/a	n/a	n/a	n/a	n/a	non-smoker	mild
642	25	female	no	n/a	n/a	n/a	n/a	n/a	non-smoker	mild
643	20	female	no	n/a	n/a	n/a	n/a	n/a	non-smoker	moderate
644	28	female	no	n/a	n/a	n/a	n/a	n/a	non-smoker	mild
645	37	male	no	n/a	n/a	n/a	n/a	n/a	non-smoker	mild
646	35	male	no	n/a	n/a	n/a	n/a	n/a	non-smoker	mild
647	60	female	yes	TRUE	TRUE	n/a	n/a	n/a	non-smoker	moderate
648	18	female	no	n/a	n/a	n/a	n/a	n/a	non-smoker	mild
649	18	male	no	n/a	n/a	n/a	n/a	n/a	non-smoker	mild
650	40	male	no	n/a	n/a	n/a	n/a	n/a	ever-smoker	mild
651	60	female	yes	TRUE	n/a	n/a	TRUE	n/a	ever-smoker	severe
652	32	male	no	n/a	n/a	n/a	n/a	n/a	non-smoker	mild
653	34	male	no	n/a	n/a	n/a	n/a	n/a	non-smoker	mild
654	25	male	no	n/a	n/a	n/a	n/a	n/a	non-smoker	mild
655	33	male	no	n/a	n/a	n/a	n/a	n/a	non-smoker	mild
656	49	male	no	n/a	n/a	n/a	n/a	n/a	non-smoker	mild
657	22	male	no	n/a	n/a	n/a	n/a	n/a	non-smoker	mild
658	30	female	no	n/a	n/a	n/a	n/a	n/a	non-smoker	mild
659	30	female	no	n/a	n/a	n/a	n/a	n/a	non-smoker	mild
660	24	female	yes	TRUE	n/a	n/a	n/a	n/a	non-smoker	moderate
661	50	male	yes	n/a	n/a	n/a	TRUE	n/a	non-smoker	moderate
662	48	male	no	n/a	n/a	n/a	n/a	n/a	non-smoker	moderate
663	35	male	no	n/a	n/a	n/a	n/a	n/a	non-smoker	mild
664	54	male	no	n/a	n/a	n/a	n/a	n/a	non-smoker	moderate
665	58	female	yes	TRUE	n/a	n/a	n/a	n/a	non-smoker	mild
666	60	female	yes	n/a	n/a	TRUE	n/a	n/a	ever-smoker	severe
667	55	female	yes	TRUE	TRUE	n/a	n/a	n/a	non-smoker	severe
668	18	female	no	n/a	n/a	n/a	n/a	n/a	non-smoker	mild
669	60	female	no	n/a	n/a	n/a	n/a	n/a	ever-smoker	mild
670	26	female	no	n/a	n/a	n/a	n/a	n/a	non-smoker	mild
671	25	male	no	n/a	n/a	n/a	n/a	n/a	non-smoker	mild
672	26	female	no	n/a	n/a	n/a	n/a	n/a	non-smoker	mild
673	87	female	yes	n/a	n/a	TRUE	n/a	n/a	non-smoker	severe
674	28	male	no	n/a	n/a	n/a	n/a	n/a	non-smoker	mild
675	90	female	yes	TRUE	n/a	n/a	n/a	n/a	non-smoker	moderate
676	65	female	no	n/a	n/a	n/a	n/a	n/a	non-smoker	mild
677	37	female	no	n/a	n/a	n/a	n/a	n/a	non-smoker	mild
678	25	female	no	n/a	n/a	n/a	n/a	n/a	non-smoker	mild
679	28	female	no	n/a	n/a	n/a	n/a	n/a	non-smoker	mild
680	47	male	yes	n/a	n/a	TRUE	n/a	n/a	non-smoker	severe
681	27	female	no	n/a	n/a	n/a	n/a	n/a	non-smoker	mild
682	18	male	no	n/a	n/a	n/a	n/a	n/a	non-smoker	mild
683	66	male	yes	TRUE	n/a	n/a	n/a	n/a	ever-smoker	moderate
684	35	female	no	n/a	n/a	n/a	n/a	n/a	non-smoker	mild
685	24	female	no	n/a	n/a	n/a	n/a	n/a	non-smoker	moderate
686	50	female	no	n/a	n/a	n/a	n/a	n/a	non-smoker	mild
687	49	male	no	n/a	n/a	n/a	n/a	n/a	non-smoker	mild
688	22	female	no	n/a	n/a	n/a	n/a	n/a	non-smoker	mild
689	60	female	yes	n/a	n/a	TRUE	n/a	n/a	non-smoker	severe
690	28	female	no	n/a	n/a	n/a	n/a	n/a	non-smoker	mild
691	50	male	no	n/a	n/a	n/a	n/a	n/a	ever-smoker	moderate
692	50	female	yes	TRUE	n/a	n/a	TRUE	n/a	non-smoker	moderate
693	30	male	no	n/a	n/a	n/a	n/a	n/a	ever-smoker	mild
694	55	female	yes	n/a	n/a	TRUE	n/a	n/a	ever-smoker	critical
695	22	female	no	n/a	n/a	n/a	n/a	n/a	non-smoker	mild
696	45	male	yes	n/a	TRUE	n/a	n/a	n/a	ever-smoker	mild
697	25	female	no	n/a	n/a	n/a	n/a	n/a	non-smoker	mild
698	21	female	no	n/a	n/a	n/a	n/a	n/a	non-smoker	mild
699	45	female	no	n/a	n/a	n/a	n/a	n/a	non-smoker	mild
700	47	male	no	n/a	n/a	n/a	n/a	n/a	non-smoker	moderate
701	60	female	yes	n/a	n/a	TRUE	n/a	n/a	non-smoker	moderate
702	55	female	yes	TRUE	TRUE	n/a	n/a	n/a	non-smoker	moderate
703	55	female	yes	n/a	n/a	n/a	n/a	TRUE	ever-smoker	moderate
704	50	female	yes	TRUE	n/a	n/a	n/a	n/a	non-smoker	moderate
705	35	male	no	n/a	n/a	n/a	n/a	n/a	non-smoker	mild
706	30	female	no	n/a	n/a	n/a	n/a	n/a	non-smoker	mild
707	26	female	no	n/a	n/a	n/a	n/a	n/a	non-smoker	mild
708	30	female	no	n/a	n/a	n/a	n/a	n/a	non-smoker	mild
709	45	female	yes	TRUE	TRUE	TRUE	n/a	n/a	non-smoker	severe
710	75	male	yes	TRUE	n/a	TRUE	n/a	n/a	ever-smoker	severe
711	26	female	no	n/a	n/a	n/a	n/a	n/a	non-smoker	mild
712	60	female	yes	n/a	TRUE	TRUE	n/a	n/a	ever-smoker	severe
713	18	female	no	n/a	n/a	n/a	n/a	n/a	non-smoker	mild
714	22	female	no	n/a	n/a	n/a	n/a	n/a	non-smoker	mild
715	40	female	no	n/a	n/a	n/a	n/a	n/a	non-smoker	moderate
716	75	male	no	n/a	n/a	n/a	n/a	n/a	non-smoker	moderate
717	50	male	no	n/a	n/a	n/a	n/a	n/a	ever-smoker	mild
718	75	female	yes	TRUE	n/a	TRUE	n/a	n/a	non-smoker	critical
719	35	male	no	n/a	n/a	n/a	n/a	n/a	ever-smoker	mild
720	26	female	no	n/a	n/a	n/a	n/a	n/a	non-smoker	mild
721	50	female	yes	n/a	n/a	TRUE	n/a	n/a	ever-smoker	moderate
722	19	male	no	n/a	n/a	n/a	n/a	n/a	non-smoker	mild
723	60	male	yes	n/a	n/a	TRUE	n/a	n/a	ever-smoker	severe
724	41	male	no	n/a	n/a	n/a	n/a	n/a	non-smoker	mild
725	27	female	yes	TRUE	n/a	n/a	TRUE	n/a	non-smoker	moderate
726	35	female	no	n/a	n/a	n/a	n/a	n/a	non-smoker	moderate
727	22	male	no	n/a	n/a	n/a	n/a	n/a	non-smoker	mild
728	65	male	yes	TRUE	n/a	n/a	n/a	n/a	ever-smoker	moderate
729	27	female	no	n/a	n/a	n/a	n/a	n/a	non-smoker	mild
730	70	male	yes	n/a	n/a	TRUE	n/a	n/a	non-smoker	severe
731	80	female	yes	n/a	n/a	n/a	n/a	n/a	non-smoker	severe
732	23	female	no	n/a	n/a	n/a	n/a	n/a	non-smoker	mild
733	35	female	yes	n/a	n/a	n/a	n/a	TRUE	non-smoker	moderate
734	18	female	no	n/a	n/a	n/a	n/a	n/a	non-smoker	mild
735	50	female	no	n/a	n/a	n/a	n/a	n/a	non-smoker	moderate
736	22	female	no	n/a	n/a	n/a	n/a	n/a	non-smoker	moderate
737	22	female	no	n/a	n/a	n/a	n/a	n/a	non-smoker	moderate
738	53	female	yes	TRUE	TRUE	n/a	n/a	n/a	non-smoker	moderate
739	63	female	yes	TRUE	TRUE	n/a	n/a	n/a	ever-smoker	moderate
740	50	male	yes	TRUE	n/a	n/a	n/a	n/a	non-smoker	moderate
741	30	male	no	n/a	n/a	n/a	n/a	n/a	non-smoker	mild
742	40	female	no	n/a	n/a	n/a	n/a	n/a	non-smoker	severe
743	65	male	yes	TRUE	n/a	TRUE	n/a	n/a	ever-smoker	severe
744	52	female	yes	TRUE	n/a	n/a	n/a	n/a	non-smoker	moderate
745	65	female	no	n/a	n/a	n/a	n/a	n/a	ever-smoker	severe
746	24	female	no	n/a	n/a	n/a	n/a	n/a	non-smoker	mild
747	20	female	no	n/a	n/a	n/a	n/a	n/a	non-smoker	mild
748	90	female	no	n/a	n/a	n/a	n/a	n/a	non-smoker	severe
749	45	female	no	n/a	n/a	n/a	n/a	n/a	non-smoker	mild
750	62	female	yes	n/a	n/a	TRUE	n/a	n/a	ever-smoker	critical
751	20	female	no	n/a	n/a	n/a	n/a	n/a	non-smoker	mild
752	30	female	no	n/a	n/a	n/a	n/a	n/a	non-smoker	mild
753	36	male	no	n/a	n/a	n/a	n/a	n/a	non-smoker	mild
754	70	female	yes	n/a	n/a	n/a	n/a	n/a	ever-smoker	severe
755	20	male	no	n/a	n/a	n/a	n/a	n/a	non-smoker	mild
756	18	female	no	n/a	n/a	n/a	n/a	n/a	non-smoker	mild
757	19	female	no	n/a	n/a	n/a	n/a	n/a	non-smoker	mild
758	55	male	yes	n/a	n/a	n/a	n/a	n/a	ever-smoker	severe
759	70	male	yes	n/a	n/a	n/a	n/a	n/a	ever-smoker	mild
760	80	female	yes	n/a	TRUE	TRUE	TRUE	n/a	ever-smoker	critical
761	30	female	no	n/a	n/a	n/a	n/a	n/a	ever-smoker	mild
762	30	female	no	n/a	n/a	n/a	n/a	n/a	non-smoker	mild
763	50	female	no	n/a	n/a	n/a	n/a	n/a	non-smoker	mild
764	30	female	no	n/a	n/a	n/a	n/a	n/a	ever-smoker	moderate
765	70	female	no	n/a	n/a	n/a	n/a	n/a	ever-smoker	mild
766	60	female	yes	TRUE	TRUE	n/a	n/a	n/a	non-smoker	moderate
767	40	female	no	n/a	n/a	n/a	n/a	n/a	non-smoker	mild
768	75	male	yes	n/a	n/a	TRUE	n/a	n/a	ever-smoker	severe
769	32	female	no	n/a	n/a	n/a	n/a	n/a	non-smoker	mild
770	40	female	yes	TRUE	n/a	n/a	n/a	n/a	non-smoker	moderate
771	52	male	no	n/a	n/a	n/a	n/a	n/a	non-smoker	moderate
772	18	female	no	n/a	n/a	n/a	n/a	n/a	non-smoker	moderate
773	30	female	no	n/a	n/a	n/a	n/a	n/a	non-smoker	mild
774	70	male	yes	n/a	TRUE	n/a	n/a	n/a	non-smoker	moderate
775	45	female	yes	n/a	TRUE	TRUE	n/a	n/a	non-smoker	severe
776	18	female	no	n/a	n/a	n/a	n/a	n/a	non-smoker	mild
777	55	female	yes	TRUE	TRUE	n/a	n/a	n/a	non-smoker	moderate
778	22	male	no	n/a	n/a	n/a	n/a	n/a	non-smoker	mild
779	38	male	no	n/a	n/a	n/a	n/a	n/a	non-smoker	moderate
780	50	female	no	n/a	n/a	n/a	n/a	n/a	non-smoker	moderate
781	47	female	yes	TRUE	TRUE	n/a	n/a	n/a	non-smoker	moderate
782	27	female	no	n/a	n/a	n/a	n/a	n/a	non-smoker	mild
783	50	female	yes	TRUE	TRUE	n/a	n/a	n/a	ever-smoker	moderate
784	30	female	no	n/a	n/a	n/a	n/a	n/a	non-smoker	moderate
785	24	male	no	n/a	n/a	n/a	n/a	n/a	non-smoker	mild
786	27	female	no	n/a	n/a	n/a	n/a	n/a	non-smoker	mild
787	50	male	no	n/a	n/a	n/a	n/a	n/a	non-smoker	severe
788	52	female	no	n/a	n/a	n/a	n/a	n/a	non-smoker	moderate
